# Supplementary material for: Successful Multi-Level HPV Vaccination Intervention at a Rural Healthcare Center in the Era of COVID-19
Source: PubMed Central journal article supplement (PMC8521914; doi:10.3389/fdgth.2021.719138), 2021-08-19
Supplement: Table_1.pdf [file Table_1.pdf]

**Table S1. Sensitivity analysis for cross sectional review of HPV vaccination at Telluride Medical Center (TMC) pre- and post-intervention, 2019-2021<sup>a</sup>**

|                                                                                        | Pre-<br>Intervention<br>(n=402) |        | Post-<br>Intervention<br>(n=99) |        | $\chi^2$<br><i>p-value</i> <sup>b</sup> | Post-Intervention,<br>Overlaps Removed<br>(n=72) |        | $\chi^2$<br><i>p-value</i> <sup>b</sup> |
|----------------------------------------------------------------------------------------|---------------------------------|--------|---------------------------------|--------|-----------------------------------------|--------------------------------------------------|--------|-----------------------------------------|
|                                                                                        | n                               | (%)    | n                               | (%)    |                                         | n                                                | (%)    |                                         |
| <b>Age at time of visit<sup>c</sup></b>                                                |                                 |        |                                 |        | **0.05                                  |                                                  |        | **0.05                                  |
| 10-14                                                                                  | 138                             | (34.3) | 21                              | (21.2) |                                         | 13                                               | (18.1) |                                         |
| 15-18                                                                                  | 129                             | (32.1) | 29                              | (29.3) |                                         | 15                                               | (20.8) |                                         |
| 19-28                                                                                  | 135                             | (33.6) | 49                              | (49.5) |                                         | 44                                               | (61.1) |                                         |
| <b>Wellness visit: Annual physical or well child check</b>                             |                                 |        |                                 |        | 0.1656                                  |                                                  |        | 0.9971                                  |
| No                                                                                     | 296                             | (73.6) | 66                              | (66.7) |                                         | 53                                               | (73.6) |                                         |
| Yes                                                                                    | 106                             | (26.4) | 33                              | (33.3) |                                         | 19                                               | (26.4) |                                         |
| <b>Other visit: non-wellness visit (acute care or other)</b>                           |                                 |        |                                 |        | *0.1222                                 |                                                  |        | 0.891                                   |
| No                                                                                     | 103                             | (25.6) | 33                              | (33.3) |                                         | 19                                               | (26.4) |                                         |
| Yes                                                                                    | 299                             | (74.4) | 66                              | (66.7) |                                         | 53                                               | (73.6) |                                         |
| <b>UTD on HPV: Up to date on HPV at beginning of visit</b>                             |                                 |        |                                 |        | 0.3704                                  |                                                  |        | **0.017                                 |
| No                                                                                     | 236                             | (58.7) | 63                              | (63.6) |                                         | 53                                               | (73.6) |                                         |
| Yes                                                                                    | 166                             | (41.3) | 36                              | (36.4) |                                         | 19                                               | (26.4) |                                         |
| <b>Due for HPV: at time of visit</b>                                                   |                                 |        |                                 |        | ***0.0035                               |                                                  |        | ***0.0003                               |
| No                                                                                     | 259                             | (64.4) | 79                              | (79.8) |                                         | 62                                               | (86.1) |                                         |
| Yes                                                                                    | 143                             | (35.6) | 20                              | (20.2) |                                         | 10                                               | (13.9) |                                         |
| <b>Received HPV: at visit in question</b>                                              |                                 |        |                                 |        | 0.8533                                  |                                                  |        | 0.4578                                  |
| No                                                                                     | 363                             | (90.3) | 90                              | (90.9) |                                         | 67                                               | (93.1) |                                         |
| Yes                                                                                    | 39                              | (9.7)  | 9                               | (9.1)  |                                         | 5                                                | (6.9)  |                                         |
| <b>Missed opportunity: patient was due for vaccine but did not receive it at visit</b> |                                 |        |                                 |        | ***0.0020                               |                                                  |        | ***0.0014                               |
| No                                                                                     | 315                             | (78.4) | 91                              | (91.9) |                                         | 68                                               | (94.4) |                                         |
| Yes                                                                                    | 87                              | (21.6) | 8                               | (8.1)  |                                         | 4                                                | (5.6)  |                                         |
| <b>Due now: based on current date, patient is due for booster or initial vaccine</b>   |                                 |        |                                 |        | ***<.0001                               |                                                  |        | ***<.0001                               |
| No                                                                                     | 282                             | (70.2) | 91                              | (91.9) |                                         | 68                                               | (94.4) |                                         |
| Yes                                                                                    | 120                             | (29.9) | 8                               | (8.1)  |                                         | 4                                                | (5.6)  |                                         |
| <b>Declines: patient or parent declined at time of visit</b>                           |                                 |        |                                 |        | 0.6281                                  |                                                  |        | 0.3737                                  |
| No                                                                                     | 381                             | (94.8) | 95                              | (96.0) |                                         | 70                                               | (97.2) |                                         |
| Yes                                                                                    | 21                              | (5.2)  | 4                               | (4.0)  |                                         | 2                                                | (2.8)  |                                         |
| <b>No records: patient does not have any vaccine records on file</b>                   |                                 |        |                                 |        | ***<.0001                               |                                                  |        | ***<.0001                               |
| No                                                                                     | 312                             | (77.6) | 56                              | (56.6) |                                         | 29                                               | (40.3) |                                         |
| Yes                                                                                    | 90                              | (22.4) | 43                              | (43.4) |                                         | 43                                               | (59.7) |                                         |

<sup>a</sup>Cross sectional retrospective chart review performed for patients (ages 10-28 years) visiting the clinic between 09/01/2019 and 12/01/2019 (pre-intervention) or between 01/15/2021 and 03/15/2021 (post-intervention). TMC is a rural (CMS RHC, FORHP, FAR level=4, RUCA=10.0, RUCC=9, UIC=12, MUA, and HPSA for primary care and mental health) medical center located in Colorado.

<sup>b</sup>P-values shown. Pearson  $\chi^2$  with probability calculated for categorical variables. No overlap in 95% CIs, with normal distribution assumption, of median age pre- and post-intervention was witnessed and was confirmed in sensitivity analysis. (Pre- intervention: kurtosis= -0.96, skewness= 0.50; Post-intervention kurtosis= -1.37, skewness= 0.09; Limited post-intervention: kurtosis= -1.28, skewness= -0.30). \*Significant at  $\alpha \leq 0.1$ , \*\*significant at  $\alpha \leq 0.05$ , \*\*\*significant at  $\alpha \leq 0.01$

<sup>c</sup>Age collected as a continuous variable (Pre-intervention  $\bar{X}$ =17.47, M=17, s=4.72; Post-intervention  $\bar{X}$ =18.99, M=18, s=4.61; Limited post-intervention:  $\bar{X}$ =19.85, M=21, s=4.73).

<sup>d</sup>Those without a vaccine record on file and not up-to-date, have an "unknown" HPV vaccination status (pre-intervention n=90, 38.1% of those not up-to-date; post-intervention n=43, 68.3% of those not up-to-date).
